# Supplementary material
Source: HighWire-hosted journal article supplement (https://www.cfp.ca/highwire/filestream/34402/field_highwire_adjunct_files/0/321_Additional_Resources.pdf)
Supplement: 321_Additional_Resources.pdf [file 321_Additional_Resources.pdf]

## Appendix 3. Additional Resources

### Buprenorphine-naloxone (Suboxone®) Patient Information

Alberta Health Services Suboxone® Information for Clients:

<https://www.albertahealthservices.ca/assets/programs/ps-1000286-odp-suboxone.pdf>

### Starting Buprenorphine-Naloxone (Suboxone®) at Home

British Columbia Ministry of Health, Doctors of BC and British Columbia Centre on Substance Abuse:

<https://www2.gov.bc.ca/assets/gov/health/practitioner-pro/bc-guidelines/oud-induction-handout.pdf>

### Example of Patient Treatment Agreements

British Columbia Centre on Substance Use. A Guideline for Clinical Management of Opioid Use Disorder (pg.61-71): [http://www.bccsu.ca/wp-content/uploads/2018/05/BC\\_OUD\\_Guideline.pdf](http://www.bccsu.ca/wp-content/uploads/2018/05/BC_OUD_Guideline.pdf)

- Methadone Treatment Agreement and Consent Form pg. 61-63
- Buprenorphine/Naloxone Treatment Agreement and Consent Form pg. 64-66

### Urine Drug Testing in Long-term Opioid Therapy

College of Physicians and Surgeons of Alberta: <http://www.cpsa.ca/wp-content/uploads/2016/08/Clinical-Toolkit-Urine-Drug-Screening-v2.pdf>

### Opioid Use Disorder in Pregnancy

British Columbia Centre on Substance Use. Treatment of Opioid Use Disorder During Pregnancy:

<http://www.bccsu.ca/wp-content/uploads/2018/06/LOUD-Pregnancy.pdf>

### Mentorship

Check your Provincial Colleges, Associations or other similar organizations for mentorship programs in your area (e.g. the [Collaborative Mentorship Network](#) in Alberta or [the Collaborative Mentoring Networks](#) in Ontario).

### Provincial and Territorial Resource Links for Opioid Use Disorder (Accessed March 11, 2019)

| Provincial/<br>Territorial<br>Resources | Website                                                                                                                                                                                                                                                                                                           |
|-----------------------------------------|-------------------------------------------------------------------------------------------------------------------------------------------------------------------------------------------------------------------------------------------------------------------------------------------------------------------|
| AB                                      | <a href="http://www.cpsa.ca/physician-prescribing-practices/methadone-program/">http://www.cpsa.ca/physician-prescribing-practices/methadone-program/</a>                                                                                                                                                         |
| BC                                      | <a href="https://www.cpsbc.ca/files/pdf/MB-WS-101-2016-12-10-P05-Suboxone.pdf">https://www.cpsbc.ca/files/pdf/MB-WS-101-2016-12-10-P05-Suboxone.pdf</a>                                                                                                                                                           |
| SK                                      | <a href="https://www.cps.sk.ca/imis/CPSS/Programs_and_Services/Opioid_Agonist_Therapy_Program.aspx?OATPCCO=Opioid%20Agonist%20Therapy%20Program%20Overview">https://www.cps.sk.ca/imis/CPSS/Programs_and_Services/Opioid_Agonist_Therapy_Program.aspx?OATPCCO=Opioid%20Agonist%20Therapy%20Program%20Overview</a> |
| MB                                      | <a href="https://cpsm.mb.ca/cjj39alckF30a/wp-content/uploads/Practice%20Directions/Prescribing%20Methadone%20and%20Suboxone.pdf">https://cpsm.mb.ca/cjj39alckF30a/wp-content/uploads/Practice%20Directions/Prescribing%20Methadone%20and%20Suboxone.pdf</a>                                                       |

|     |                                                                                                                                                                                                                                     |
|-----|-------------------------------------------------------------------------------------------------------------------------------------------------------------------------------------------------------------------------------------|
| ON  | <a href="https://www.cpso.on.ca/CPSO/media/documents/Methadone/FAQs-Prescribing-Buprenorphine.pdf">https://www.cpso.on.ca/CPSO/media/documents/Methadone/FAQs-Prescribing-Buprenorphine.pdf</a>                                     |
| QC  | <a href="http://www.cmq.org/publications-pdf/p-1-2009-06-01-fr-buprenorphine-traitement-dependance-aux-opioides.pdf">http://www.cmq.org/publications-pdf/p-1-2009-06-01-fr-buprenorphine-traitement-dependance-aux-opioides.pdf</a> |
| NB  | <a href="http://cpsnb.org/en/medical-act-regulations-and-guidelines/guidelines/449-opioid-substitution-therapy">http://cpsnb.org/en/medical-act-regulations-and-guidelines/guidelines/449-opioid-substitution-therapy</a>           |
| NS  | <a href="https://cpsns.ns.ca/wp-content/uploads/2017/10/Methadone-Maintenance-Treatment-Handbook.pdf">https://cpsns.ns.ca/wp-content/uploads/2017/10/Methadone-Maintenance-Treatment-Handbook.pdf</a>                               |
| PEI | <a href="http://cpspei.ca/wp-content/uploads/2018/06/BUPRENORPHINE-Standard-for-Opioid-Dependency-June-2018.pdf">http://cpspei.ca/wp-content/uploads/2018/06/BUPRENORPHINE-Standard-for-Opioid-Dependency-June-2018.pdf</a>         |
| NL  | <a href="https://www.cpsnl.ca/web/files/2017-06-21%20-%20Suboxone%20(Practice%20Guideline).pdf">https://www.cpsnl.ca/web/files/2017-06-21%20-%20Suboxone%20(Practice%20Guideline).pdf</a>                                           |
| YK  | <a href="http://www.yukonmedicalcouncil.ca/pdfs/OAT_Standard_of_Practice.pdf">http://www.yukonmedicalcouncil.ca/pdfs/OAT_Standard_of_Practice.pdf</a>                                                                               |
| NWT | <a href="https://www.hss.gov.nt.ca/en/services/opioid-overdose-prevention/opioid-maintenance-therapy-yellowknife">https://www.hss.gov.nt.ca/en/services/opioid-overdose-prevention/opioid-maintenance-therapy-yellowknife</a>       |
| NU  | <a href="https://www.nunavut-physicians.gov.nu.ca/">https://www.nunavut-physicians.gov.nu.ca/</a>                                                                                                                                   |

Please note that at the time of publication opioid use disorder treatment programs were not available on every province/territory web page.
